# Supplementary material for: Co-expression analysis and identification of fecundity-related long non-coding RNAs in sheep ovaries
Source: PubMed Central journal article supplement (PMC5159859; doi:10.1038/srep39398), 2016-12-16
Supplement: srep39398-s1.pdf [file srep39398-s1.pdf]

Supplementary Information

**Co-expression analysis and identification of fecundity-related long non-coding  
RNAs in sheep ovaries**

Xiangyang Miao\* Qingmiao Luo Huijing Zhao Xiaoyu Qin

Institute of Animal Sciences, Chinese Academy of Agricultural Sciences,  
Beijing, 100193, China

\*Corresponding author: Xiangyang Miao Institute of Animal Sciences, Chinese  
Academy of Agricultural Sciences, Beijing, 100193, China, Tel: 86-10-62895663,  
Fax: 86-10-62895663 (China), E-mail: miaoxy32@163.com, mxy32@sohu.com

**Table S1** The identified genes and long non-coding RNAs in 16 modules

**Table S2** The enriched biological process for differentially expressed genes from  
HanBBvsDorset

**Table S3** The enriched biological process for differentially expressed genes from  
HanBBvsHan++

**Table S4** The enriched biological process for differentially expressed genes from  
Han++vsDorset

**Table S5** The enriched cellular component for differentially expressed genes from  
HanBBvsDorset

**Table S6** The enriched cellular component for differentially expressed genes from  
HanBBvsHan++

**Table S7** The enriched cellular component for differentially expressed genes from Han++vsDorset

**Table S8** The enriched molecular function for differentially expressed genes from HanBBvsDorset

**Table S9** The enriched molecular function for differentially expressed genes from HanBBvsHan++

**Table S10** The enriched molecular function for differentially expressed genes from Han++vsDorset

**Table S11** Cis-target genes of differentially expressed lncRNAs

**Table S12** Trans-target genes of partial differentially expressed lncRNAs

**Table S1** The identified genes and long non-coding RNAs in 16 modules

| <b>colnames. datExpr0.</b> | <b>net. colors</b> |
|----------------------------|--------------------|
| TMEFF2                     | yellow             |
| LOC101119121               | blue               |
| SLC3A1                     | tan                |
| LOC101119161               | green              |
| TFEC                       | turquoise          |
| TFF3                       | lightcyan          |
| HINT1                      | yellow             |
| ALS2CR12                   | green              |
| LOC101122204               | red                |
| LOC101122205               | yellow             |
| SCNN1B                     | red                |
| SGPL1                      | cyan               |
| ACAP3                      | brown              |
| FUK                        | magenta            |
| ZFHX2                      | pink               |
| LOC101120029               | cyan               |
| FOS                        | brown              |
| LOC101119221               | yellow             |
| HK3                        | purple             |
| LOC101119256               | tan                |
| LOC101119283               | greenyellow        |
| ARAP2. 1                   | green              |
| LOC101122107               | pink               |
| SH2B2                      | blue               |
| CNTD1                      | turquoise          |
| GEN1                       | salmon             |
| XLOC_019586                | yellow             |
| XLOC_019593                | turquoise          |
| PTPN3                      | turquoise          |
| XLOC_005851                | green              |
| GRN                        | black              |
| MC1R                       | blue               |
| F5                         | purple             |
| GK                         | red                |
| DPP10                      | cyan               |
| LOC101122411               | yellow             |
| OLR1                       | green              |
| IQUB                       | turquoise          |
| XK                         | turquoise          |
| EFHC2                      | turquoise          |
| PLA2G3                     | salmon             |

---

|               |              |
|---------------|--------------|
| TRNAW-CCA. 19 | green        |
| TRNAW-CCA. 55 | blue         |
| ADRB3         | tan          |
| LOC101119013  | blue         |
| HMGCS2        | blue         |
| LOC101122301  | turquoise    |
| CPT1B         | red          |
| LOC101122330  | purple       |
| RAB3IP        | magenta      |
| ADRB2         | midnightblue |
| IRX4          | black        |
| XLOC_029026   | cyan         |
| XLOC_029019   | brown        |
| DNASE1L2      | pink         |
| PITX2         | cyan         |
| LOC101122286  | green        |
| LOC101114970  | greenyellow  |
| RAB39B        | yellow       |
| LOC101114966  | blue         |
| GAPT          | green        |
| USP36         | brown        |
| USP35         | brown        |
| USP43         | turquoise    |
| LOC101122611  | black        |
| CA4           | magenta      |
| HS3ST2        | cyan         |
| ISL2          | blue         |
| XLOC_017093   | yellow       |
| XLOC_042324   | pink         |
| XLOC_019299   | salmon       |
| C7H15orf57    | yellow       |
| XLOC_005548   | turquoise    |
| LOC100037673  | brown        |
| HIRIP3        | midnightblue |
| TAC3          | pink         |
| AQP4          | turquoise    |
| CLEC4E        | midnightblue |
| AKAP14        | turquoise    |
| TMOD2         | greenyellow  |
| TMOD1         | purple       |
| CKM           | brown        |
| MFAP2. 1      | yellow       |
| HOXC9         | magenta      |
| LRCOL1        | brown        |

---

|               |              |
|---------------|--------------|
| HOXD3         | tan          |
| GIPC2         | yellow       |
| HOXB7         | brown        |
| HOXB5         | midnightblue |
| CRH           | blue         |
| C17H12orf43   | midnightblue |
| XLOC_007390   | yellow       |
| EFS           | brown        |
| P2RX5         | yellow       |
| EBF3          | lightcyan    |
| P2RX2         | red          |
| CLDN7         | purple       |
| GDF5          | yellow       |
| VPS13C        | purple       |
| TPD52L1       | purple       |
| TRNAE-UUC. 29 | greenyellow  |
| ARSE          | purple       |
| PPFIA3        | yellow       |
| LOC101122803  | magenta      |
| CBLN3         | red          |
| XLOC_042153   | green        |
| KIAA0825      | lightcyan    |
| WDR72         | green        |
| PCDH20        | tan          |
| WDR54         | green        |
| WDR52         | turquoise    |
| WDR65         | turquoise    |
| WDR63         | turquoise    |
| WDR69         | turquoise    |
| WDR38         | turquoise    |
| WDR49         | turquoise    |
| WDR46         | red          |
| WDR16         | turquoise    |
| XLOC_005122   | tan          |
| LOC101122774  | salmon       |
| WDR96         | turquoise    |
| EHF           | turquoise    |
| KHDC3L        | turquoise    |
| ERF           | blue         |
| IGFBPL1       | salmon       |
| FBX015        | black        |
| TRNAR-UCG. 1  | salmon       |
| PIWIL1        | greenyellow  |
| PIWIL2        | brown        |

|              |              |
|--------------|--------------|
| FHAD1        | turquoise    |
| FAM65C       | blue         |
| FAM69C       | red          |
| XLOC_044102  | black        |
| ARHGAP15     | black        |
| XLOC_005052  | salmon       |
| GNG3         | greenyellow  |
| RHPN2        | green        |
| GNB3         | magenta      |
| ZBP1         | green        |
| METTL21D     | blue         |
| PAH          | blue         |
| LOC101102772 | purple       |
| ZBBX         | turquoise    |
| CREG1.1      | black        |
| KRT7         | green        |
| CENPI        | turquoise    |
| SSTR2        | turquoise    |
| ACSBG1       | brown        |
| LOC101109940 | green        |
| OSBPL10      | brown        |
| C3H2orf73    | turquoise    |
| FAM8A1       | turquoise    |
| ECT2L        | turquoise    |
| GPX2         | turquoise    |
| DTHD1        | turquoise    |
| RAB11FIP3    | brown        |
| KIF21B       | midnightblue |
| KIAA0430     | red          |
| FAM83C       | greenyellow  |
| TIGD4        | black        |
| TIGD5        | lightcyan    |
| SYBU         | lightcyan    |
| KRT222       | midnightblue |
| REL          | turquoise    |
| LOC101102509 | magenta      |
| ASIC4        | salmon       |
| RAD51C       | pink         |
| SYT2         | greenyellow  |
| BAI2         | midnightblue |
| BAI3         | magenta      |
| LOC101102443 | turquoise    |
| MLF1         | turquoise    |
| XLOC_017148  | blue         |

---

|              |              |
|--------------|--------------|
| MTSS1L       | brown        |
| KIAA0319     | cyan         |
| BAIAP3       | turquoise    |
| RNASEH2C     | green        |
| IGDCC3       | black        |
| tRNA-Gln     | blue         |
| GJB1         | purple       |
| RASGEF1A     | turquoise    |
| RALGAPA2     | green        |
| LOC101107122 | salmon       |
| OTOR         | brown        |
| FBXL19       | magenta      |
| CSN1S1       | lightcyan    |
| MREG         | tan          |
| SLC34A1      | red          |
| PTGDR2       | greenyellow  |
| KATNBL1      | purple       |
| FAM92B       | turquoise    |
| ASPHD1       | blue         |
| XLOC_029260  | green        |
| LHB          | turquoise    |
| GILT         | turquoise    |
| LOC101107227 | purple       |
| DPY19L2      | green        |
| KATNAL2      | purple       |
| RAB9B        | midnightblue |
| UBXN10       | turquoise    |
| PTGER4       | red          |
| ANKFN1       | turquoise    |
| CNTN4        | brown        |
| RAB25        | turquoise    |
| TMEM27       | blue         |
| ATP2C2       | turquoise    |
| RAB15        | green        |
| XLOC_012276  | brown        |
| SEPN1        | blue         |
| PLA2G4B      | magenta      |
| MKX          | red          |
| MIA          | blue         |
| LOC101122022 | lightcyan    |
| LOC101122021 | pink         |
| MX2          | tan          |
| ERP29        | lightcyan    |
| TMEM82       | turquoise    |

---

|               |             |
|---------------|-------------|
| TMEM8B        | yellow      |
| GM2A          | pink        |
| TMEM33        | blue        |
| MPZ           | blue        |
| TMEM44        | green       |
| FSTL5         | black       |
| SORCS1        | greenyellow |
| LOC101102982  | pink        |
| DGKB          | blue        |
| DGKQ          | lightcyan   |
| TSPAN1        | turquoise   |
| TNFSF18       | black       |
| NGB           | purple      |
| EID2          | greenyellow |
| ENKUR         | turquoise   |
| 5HT2A         | turquoise   |
| LOC101102907  | green       |
| XLOC_019859   | brown       |
| XLOC_027327   | yellow      |
| AGBL4         | purple      |
| XLOC_019813   | red         |
| BEST1         | red         |
| ORC6          | pink        |
| LOC101107030  | salmon      |
| SV2A          | pink        |
| ARHGEF38      | purple      |
| PIBF1         | red         |
| ARHGEF19      | black       |
| ERICH2        | turquoise   |
| ADRA1B        | red         |
| TRNAY-GUA. 25 | brown       |
| CPEB2         | green       |
| DNALI1        | turquoise   |
| SLC25A25      | red         |
| SLC25A28      | purple      |
| IRGQ. 1       | brown       |
| SLC25A37      | brown       |
| LOC101106326  | cyan        |
| TUBGCP6       | magenta     |
| SLC25A40      | tan         |
| ACRC          | green       |
| ADAMTS9       | pink        |
| MUSK          | green       |
| CER1          | yellow      |



|              |              |
|--------------|--------------|
| KIF9         | turquoise    |
| NUDT13       | salmon       |
| HS3ST3B1     | greenyellow  |
| IL1RAPL1     | salmon       |
| XLOC_015137  | pink         |
| LOC101110755 | yellow       |
| LOC101110773 | salmon       |
| SPAG17       | turquoise    |
| LOC101112900 | tan          |
| TTC8         | turquoise    |
| PPIL6        | tan          |
| MUC1         | lightcyan    |
| TRNAK-UUU.5  | tan          |
| RINL         | midnightblue |
| BST-2B       | lightcyan    |
| BST-2A       | magenta      |
| CHL1         | magenta      |
| RAP1GAP      | magenta      |
| KLC2         | brown        |
| PNMAL1       | midnightblue |
| PPP2R4       | turquoise    |
| LOC101112920 | brown        |
| C5H5orf46    | red          |
| FAIM2        | greenyellow  |
| LOC101112974 | green        |
| LOC101110715 | black        |
| LOC101110889 | greenyellow  |
| KCNJ3        | yellow       |
| KCNH1        | blue         |
| MSR1         | magenta      |
| Z03          | green        |
| TTC26        | red          |
| TTC29        | turquoise    |
| GM2A.1       | yellow       |
| LOC101106059 | red          |
| KCNC4        | blue         |
| CHD5         | midnightblue |
| AMDHD2       | red          |
| MYL10        | purple       |
| TSPAN17.1    | brown        |
| DIRAS2       | magenta      |
| ROS1         | yellow       |
| LOC101110150 | green        |
| FAM154B      | tan          |

---

|              |              |
|--------------|--------------|
| LOC101102259 | yellow       |
| XLOC_026611  | pink         |
| ICOS         | pink         |
| MY016        | blue         |
| PRR22        | blue         |
| GRIA2        | greenyellow  |
| GRIA1        | greenyellow  |
| KERA         | black        |
| LOC101106730 | yellow       |
| FAM159A      | brown        |
| LOC101116002 | brown        |
| LOC101110057 | red          |
| POU2F3       | greenyellow  |
| SYK          | black        |
| APOL6        | turquoise    |
| FAM167B      | red          |
| XLOC_022217  | pink         |
| ADAM33       | magenta      |
| ADAM22       | black        |
| MTNR1A       | yellow       |
| DNER         | turquoise    |
| PRRT2        | midnightblue |
| LOC101106658 | blue         |
| LOC101116132 | green        |
| ONECUT2      | purple       |
| LOC101116109 | turquoise    |
| SPDYA        | turquoise    |
| MED21        | yellow       |
| FAM131A      | midnightblue |
| C18H15orf26  | tan          |
| ZMYND10      | turquoise    |
| MYF5         | blue         |
| TFAP2B       | green        |
| TPBG         | cyan         |
| LOC101102022 | blue         |
| MED31        | black        |
| LOC101106541 | turquoise    |
| LOC101106588 | cyan         |
| ITGAM        | magenta      |
| IFI6         | magenta      |
| LOC101110481 | turquoise    |
| LOC101102165 | red          |
| CLGN         | turquoise    |
| SPG21        | pink         |

---

|               |             |
|---------------|-------------|
| KANK3         | blue        |
| NLRP14        | blue        |
| GFRA4         | turquoise   |
| GFRA3         | blue        |
| LOC101106477  | salmon      |
| LOC101106471  | purple      |
| CHAC1         | blue        |
| PODXL2        | black       |
| VGF           | blue        |
| DPF1          | blue        |
| XLOC_028961   | brown       |
| XLOC_028954   | red         |
| LOC101106418  | green       |
| LOC101106434  | blue        |
| B3GNT6        | brown       |
| EFCAB1        | turquoise   |
| PPP1R14D      | black       |
| PPP1R15A      | black       |
| FAM19A4       | salmon      |
| IRF1. 1       | turquoise   |
| MPZL2         | tan         |
| SH2D3A        | turquoise   |
| LOC101118745  | green       |
| LOC101118734  | salmon      |
| RBP2          | tan         |
| FAM190A       | turquoise   |
| ZFP36         | black       |
| FAM196A       | green       |
| MCOLN3        | pink        |
| MCOLN2        | black       |
| DNAI2         | purple      |
| KRTAP1-1      | blue        |
| DNAH7         | turquoise   |
| DNAH5         | turquoise   |
| DNAH6         | turquoise   |
| LOC101114265  | brown       |
| LOC101118607  | green       |
| TRNAK-UUU. 12 | purple      |
| TNP2          | greenyellow |
| LOC101118660  | black       |
| ALG1          | pink        |
| LOC101114349  | turquoise   |
| LOC101121777  | red         |
| LOC101104869  | blue        |

---

|               |              |
|---------------|--------------|
| LOC101104851  | magenta      |
| PPP2R5B       | tan          |
| LOC101116228  | brown        |
| LOC101116211  | yellow       |
| PPP2R2B       | turquoise    |
| SERPINA6      | yellow       |
| RPH3A         | pink         |
| LOC101121820  | magenta      |
| LOC101118562  | lightcyan    |
| C3H12orf5     | salmon       |
| DSC2          | turquoise    |
| CNIH2         | black        |
| GATA1         | brown        |
| LOC101116291  | blue         |
| LOC101104731  | tan          |
| CLIP2         | yellow       |
| LOC101114011  | blue         |
| LOC101116286  | turquoise    |
| LOC101116281  | blue         |
| LOC101104787  | black        |
| AOAH          | pink         |
| SIRT4         | yellow       |
| LOC101104797  | salmon       |
| LSM11         | yellow       |
| COX3          | midnightblue |
| TLL2          | midnightblue |
| BATF2         | lightcyan    |
| TLE2          | brown        |
| LOC101106844  | black        |
| LOC101106847  | blue         |
| CPA6          | blue         |
| LOC101106881  | midnightblue |
| SIGLEC1       | brown        |
| LOC101116302  | yellow       |
| RARB          | yellow       |
| TRNAG-CCC. 64 | tan          |
| SUV420H2      | cyan         |
| FAM183A       | turquoise    |
| FAM184B       | red          |
| ANKRD24       | brown        |
| ANKRD35       | magenta      |
| ANKRD37       | yellow       |
| ANKRD45       | turquoise    |
| LOC101114134  | blue         |

---

|              |              |
|--------------|--------------|
| TLR6         | red          |
| TLR8         | pink         |
| ANKRD65      | turquoise    |
| LAPTM5       | midnightblue |
| XLOC_036693  | salmon       |
| FAM186B      | greenyellow  |
| LOC101114191 | brown        |
| LOC101116846 | green        |
| LOC101112305 | blue         |
| LOC101104536 | black        |
| CRIP3        | green        |
| LOC101112251 | pink         |
| LOC101116922 | black        |
| LOC101118374 | pink         |
| EPCAM        | turquoise    |
| LOC101116991 | green        |
| C5H19orf21   | salmon       |
| VGLL1        | green        |
| CDC42EP2     | cyan         |
| NPY5R        | red          |
| C5H19orf57   | blue         |
| PERP         | turquoise    |
| LOC101112434 | yellow       |
| RHOF         | midnightblue |
| RARRES1      | purple       |
| LOC101104431 | green        |
| MUC13        | blue         |
| C13H20orf96  | purple       |
| RHCG         | magenta      |
| NUP62        | midnightblue |
| AGR2         | turquoise    |
| LOC101104407 | black        |
| AGMO         | red          |
| PECR         | yellow       |
| LOC101118267 | blue         |
| LOC101118245 | green        |
| AKD1         | turquoise    |
| LOC101116650 | midnightblue |
| OXSRI.1      | greenyellow  |
| C14H19orf18  | black        |
| LOC101116694 | turquoise    |
| XLOC_036962  | green        |
| PHACTR3      | brown        |
| MYH7B        | brown        |

|                 |              |
|-----------------|--------------|
| LOC101112487    | pink         |
| LOC101118186    | red          |
| LOC101112474    | pink         |
| C20H6orf141     | salmon       |
| XLOC_041882     | yellow       |
| LOC101104348    | red          |
| C-JUN. 1        | brown        |
| XLOC_004853     | green        |
| LOC101116781    | black        |
| MYH15           | yellow       |
| PDE6B           | brown        |
| GDPD5           | cyan         |
| GDPD3           | magenta      |
| HOOK1           | turquoise    |
| LOC101118060    | green        |
| LOC101112593    | greenyellow  |
| LOC101118086    | blue         |
| S100A16         | blue         |
| NYAP1           | brown        |
| HECTD2          | turquoise    |
| LOC101116801    | brown        |
| NRXN2           | magenta      |
| LOC101104286    | black        |
| XLOC_041729     | brown        |
| LOC101116828    | cyan         |
| LOC101104264    | cyan         |
| SKOR1           | blue         |
| XLOC_043421     | brown        |
| TRNAV-AAC. 9    | purple       |
| XLOC_041248     | purple       |
| LOC101105609. 1 | tan          |
| TTC21A          | green        |
| LOC101121589    | green        |
| PLEKHB1         | purple       |
| TTC23L          | purple       |
| PLEKHD1         | green        |
| LOC101123656    | pink         |
| LOC101123657    | greenyellow  |
| RPL39           | black        |
| JUND            | midnightblue |
| XLOC_018073     | blue         |
| FCER1A          | turquoise    |
| IL5RA           | turquoise    |
| DOCK10          | red          |

---

|                |             |
|----------------|-------------|
| LOC101121431   | green       |
| VDAC1          | turquoise   |
| BST1           | pink        |
| LOC101123501   | yellow      |
| ABCA9          | blue        |
| XLOC_008930    | blue        |
| NR4A1          | brown       |
| CYB561         | green       |
| LACE1          | tan         |
| NEK10          | red         |
| NEK11          | turquoise   |
| CDCP2          | brown       |
| XLOC_018337    | turquoise   |
| PLXNB3         | tan         |
| MRGPRF         | magenta     |
| PLXNC1         | magenta     |
| COMMD6         | yellow      |
| LY6G5B         | cyan        |
| SCN10A         | brown       |
| LOC101123401   | tan         |
| LOC101123437   | purple      |
| SLC6A20        | greenyellow |
| XLOC_041628    | blue        |
| PLEKHS1        | turquoise   |
| LOC101109655.1 | yellow      |
| OSBPL7         | cyan        |
| SLC46A3        | tan         |
| RBM47          | purple      |
| XLOC_004583    | green       |
| MGST1          | pink        |
| LOC101113094   | blue        |
| LOC101115899   | green       |
| EGFL8          | turquoise   |
| NECAB3         | cyan        |
| LOC101115876   | brown       |
| PKIB           | purple      |
| C2H9orf135     | lightcyan   |
| C2H9orf174     | turquoise   |
| FBXL4          | pink        |
| CAMKV          | tan         |
| PLB1           | pink        |
| FOXJ1          | turquoise   |
| ZGLP1          | green       |
| DAGLA          | red         |

---

|                |              |
|----------------|--------------|
| IL23R          | yellow       |
| MAST1          | lightcyan    |
| LOC101115749   | blue         |
| SFTPA1         | blue         |
| LOC101115768   | lightcyan    |
| C3H12orf63     | turquoise    |
| RNF32          | purple       |
| CAMSAP3        | midnightblue |
| LOC101110014.1 | green        |
| C21H11orf84    | cyan         |
| XLOC_004234    | blue         |
| C3H2orf50.1    | turquoise    |
| AXDND1         | tan          |
| PDZK1IP1       | green        |
| SCG2           | brown        |
| HTR1B          | brown        |
| HTR1F          | green        |
| NME9           | turquoise    |
| NME5           | turquoise    |
| XLOC_006360    | red          |
| PNMT           | brown        |
| XLOC_004065    | cyan         |
| MORN5          | turquoise    |
| MORN2          | tan          |
| PON2           | greenyellow  |
| IL20RB         | green        |
| TRNAK-CUU.24   | salmon       |
| NROB1          | yellow       |
| HDGF           | brown        |
| TACR1          | turquoise    |
| SPOCK1         | black        |
| ZNF784         | turquoise    |
| MEGF6          | brown        |
| PDZD7          | yellow       |
| TMEM229B       | yellow       |
| LENG1          | brown        |
| RIIAD1         | turquoise    |
| LOC101103863   | green        |
| CHRND          | blue         |
| NOD1           | salmon       |
| STRA8          | salmon       |
| HSF5           | green        |
| TMPRSS5        | brown        |
| BCORL1         | brown        |



|              |              |
|--------------|--------------|
| LOC443167    | salmon       |
| GPR52        | red          |
| TMEM212      | purple       |
| GPR21        | greenyellow  |
| GPR18        | yellow       |
| CAPSL        | turquoise    |
| CHRM3        | black        |
| S100A1       | red          |
| S100A2       | lightcyan    |
| STRN4        | brown        |
| CA5A         | lightcyan    |
| LOC101108781 | yellow       |
| DGKE. 1      | brown        |
| MAPK15       | lightcyan    |
| BCL2A1       | black        |
| NOL4         | salmon       |
| GBGT1        | brown        |
| ZNF500       | green        |
| ZNF529       | greenyellow  |
| VWA3A        | turquoise    |
| VWA3B        | turquoise    |
| TCTE1        | green        |
| MEIG1        | turquoise    |
| KIAA1147     | yellow       |
| PNPLA4       | yellow       |
| MEIS3        | purple       |
| C7H14orf166B | greenyellow  |
| BFSP1        | magenta      |
| XLOC_013348  | turquoise    |
| NSUN7        | turquoise    |
| HRH2         | midnightblue |
| LOC101108856 | blue         |
| MATN3        | cyan         |
| TMEM200C     | magenta      |
| LOC101101989 | turquoise    |
| EMID1        | brown        |
| RPS13        | pink         |
| RTP1         | tan          |
| CLDND2       | salmon       |
| ZNF687       | brown        |
| LOC443320    | yellow       |
| LOC101108945 | turquoise    |
| RPS3A        | red          |
| LOC101108140 | turquoise    |

|              |              |
|--------------|--------------|
| LOC101108131 | greenyellow  |
| LAMB3        | cyan         |
| LRIG1.1      | black        |
| STPG1        | lightcyan    |
| CDKL1        | lightcyan    |
| LOC101108102 | turquoise    |
| DHX58        | magenta      |
| LOC101123268 | greenyellow  |
| NXPE2        | blue         |
| KIAA1751     | turquoise    |
| RNF182       | turquoise    |
| LOC101123290 | brown        |
| RNF175       | blue         |
| ZNF366       | brown        |
| ZNF300       | yellow       |
| BICD1        | yellow       |
| RNF166       | lightcyan    |
| SPINT1       | red          |
| NRGN         | brown        |
| RNF112       | magenta      |
| METTL24      | turquoise    |
| STX1B        | greenyellow  |
| NACAD        | lightcyan    |
| CDHR4        | turquoise    |
| SPAG6        | turquoise    |
| LOC101123128 | yellow       |
| FMNL1        | purple       |
| ZNF467       | red          |
| SLC44A3      | salmon       |
| SLC44A4      | turquoise    |
| CD01         | pink         |
| DCDC2C       | lightcyan    |
| DCDC2B       | turquoise    |
| CDH1         | green        |
| CDS1         | turquoise    |
| FGF16        | midnightblue |
| C8H6orf165   | turquoise    |
| RYR3         | brown        |
| TMEM128      | pink         |
| EMILIN3      | magenta      |
| TMEM116      | pink         |
| SLFN12L      | green        |
| LOC101123097 | yellow       |
| FAM216B      | turquoise    |

---

|                |              |
|----------------|--------------|
| HILPDA         | yellow       |
| LOC101108423   | yellow       |
| LOC101108480   | salmon       |
| CRYBA4         | yellow       |
| CAPS           | turquoise    |
| NLGN3          | greenyellow  |
| ZNF182         | turquoise    |
| CARS           | cyan         |
| ROPN1L         | turquoise    |
| CITED4         | blue         |
| XLOC_018698    | purple       |
| ZNF296         | yellow       |
| PDE11A         | lightcyan    |
| TRIQQ          | red          |
| LOC101108533   | brown        |
| OSBP2          | brown        |
| XLOC_043354    | tan          |
| PKHD1L1        | blue         |
| LOC101107441   | green        |
| NFAT5.1        | green        |
| LOC101105256   | yellow       |
| LOC101109191   | black        |
| IFFO1          | red          |
| LRRN2          | brown        |
| FAM221A        | turquoise    |
| SMIM8          | turquoise    |
| LOC101109142   | red          |
| SLC26A10       | magenta      |
| FAM46B         | magenta      |
| CCDC85A        | midnightblue |
| SLITRK6        | brown        |
| NRBP2          | purple       |
| REEP4          | yellow       |
| KPNA7          | green        |
| LOC101103164   | turquoise    |
| FOXRED2        | green        |
| LOC101102345.1 | pink         |
| LOC101103153   | blue         |
| LOC101103150   | yellow       |
| WNT9B          | black        |
| CDC42BPA.2     | blue         |
| PTP4A3         | black        |
| CLN5.1         | blue         |
| DHRS7          | yellow       |

---

|              |              |
|--------------|--------------|
| LOC101109492 | tan          |
| LOC101105437 | greenyellow  |
| RSPH9        | turquoise    |
| LOC101107613 | yellow       |
| SNTN         | turquoise    |
| SP17         | turquoise    |
| LOC101117063 | blue         |
| LOC101103296 | pink         |
| EME2         | brown        |
| LOC101109338 | blue         |
| ZDHC7        | midnightblue |
| LOC101103216 | tan          |
| LOC101105367 | black        |
| LOC101107563 | cyan         |
| AP1M2        | turquoise    |
| SLC26A2.1    | red          |
| LOC101111935 | greenyellow  |
| LOC101111926 | purple       |
| XLOC_015771  | brown        |
| ENPP3        | turquoise    |
| COL11A2      | tan          |
| SCUBE1       | blue         |
| ALDH8A1      | yellow       |
| LOC101103317 | lightcyan    |
| NFKBIA       | greenyellow  |
| CDR2L        | brown        |
| CCDC28B      | magenta      |
| XLOC_025521  | turquoise    |
| MMP13        | yellow       |
| ELN.1        | brown        |
| XLOC_023265  | greenyellow  |
| C1H1orf110   | green        |
| KRT19        | magenta      |
| KRT18        | purple       |
| LOC101107832 | greenyellow  |
| C1H1orf194   | purple       |
| C1H1orf192   | brown        |
| C1H1orf168   | turquoise    |
| KIFC2        | magenta      |
| BCL2L12      | lightcyan    |
| LOC101103419 | turquoise    |
| LOC101111712 | blue         |
| LOC101111710 | pink         |
| SYTL5        | cyan         |

---

|              |              |
|--------------|--------------|
| TRMT61B      | brown        |
| LRRIQ3       | tan          |
| LRRIQ1       | turquoise    |
| CDRT4        | green        |
| SLC01C1      | greenyellow  |
| WHSC2        | magenta      |
| LOC101109564 | pink         |
| LOC101117224 | turquoise    |
| RSPH10B      | turquoise    |
| LOC101107743 | yellow       |
| RPGRIP1L     | turquoise    |
| LOC101107776 | black        |
| MARVELD1     | brown        |
| FRMPD2       | green        |
| LOC101105008 | salmon       |
| LOC101103597 | turquoise    |
| LOC101103570 | cyan         |
| TRNAG-GCC. 2 | blue         |
| XLOC_025391  | blue         |
| LOC101117365 | salmon       |
| LOC101109865 | blue         |
| LOC101111391 | blue         |
| LOC101105090 | midnightblue |
| LOC101105099 | lightcyan    |
| C24H16orf54  | turquoise    |
| LOC101103624 | yellow       |
| CCDC13       | turquoise    |
| GRB7         | purple       |
| CCDC37       | turquoise    |
| CCDC39       | turquoise    |
| CCDC136      | brown        |
| ST14         | turquoise    |
| TPPP3        | turquoise    |
| CCDC160      | turquoise    |
| SLC28A3      | turquoise    |
| CCDC153      | turquoise    |
| CCDC159      | cyan         |
| CCDC78       | turquoise    |
| RCAN2        | yellow       |
| AKR1E2       | lightcyan    |
| LOC101117455 | blue         |
| INHBA. 1     | yellow       |
| ZFAND4       | tan          |
| LOC101103749 | salmon       |

---

|              |              |
|--------------|--------------|
| LOC101107996 | pink         |
| PCBD1        | tan          |
| LOC101119835 | brown        |
| DUSP27       | tan          |
| C23H18orf54  | turquoise    |
| URO1         | green        |
| ICAM-1.1     | lightcyan    |
| LOC101119869 | yellow       |
| LOC101111150 | blue         |
| SSBP4        | cyan         |
| LOC101117587 | pink         |
| HOXC13       | midnightblue |
| XLOC_032521  | blue         |
| MYBPC2       | yellow       |
| MYBPC1       | salmon       |
| NET01        | turquoise    |
| XLOC_035213  | yellow       |
| XLOC_020993  | tan          |
| K2.12        | blue         |
| CXHXorf22    | turquoise    |
| LGI1         | salmon       |
| PELP1        | brown        |
| CXHXorf30    | turquoise    |
| CXHXorf61    | black        |
| DCDC2        | green        |
| LOC101119773 | cyan         |
| CCL11        | yellow       |
| LOC101119765 | blue         |
| DOCK2        | red          |
| LOC101113545 | turquoise    |
| CRISP3       | greenyellow  |
| LOC101111310 | midnightblue |
| GSDMD        | black        |
| LOC101115488 | blue         |
| LOC101111343 | blue         |
| SHROOM1      | red          |
| XLOC_045018  | turquoise    |
| LOC101122944 | purple       |
| LOC101122910 | blue         |
| KIF1A        | tan          |
| XLOC_039472  | magenta      |
| BBOX1        | blue         |
| XLOC_039480  | cyan         |
| LOC101113126 | greenyellow  |

---

|              |              |
|--------------|--------------|
| GRXCR2       | blue         |
| LOC101113134 | greenyellow  |
| TRNAD-GUC. 7 | cyan         |
| XLOC_001041  | yellow       |
| TRNAD-GUC. 3 | black        |
| PLIN1        | cyan         |
| PHGDH        | yellow       |
| EMC1. 1      | brown        |
| LOC101122977 | blue         |
| LRGUK        | turquoise    |
| PPP1R26      | magenta      |
| L1CAM        | brown        |
| PPP1R32      | green        |
| LOC101117804 | midnightblue |
| C15H11orf88  | green        |
| C15H11orf71  | pink         |
| LCN2         | pink         |
| C15H11orf65  | purple       |
| AFMID        | yellow       |
| DCAKD        | brown        |
| GYLTL1B      | midnightblue |
| LOC101115687 | blue         |
| LOC101113282 | red          |
| LRRC23       | turquoise    |
| LRRC36       | turquoise    |
| LOC101113881 | brown        |
| LRRC48       | turquoise    |
| LRRC4B       | black        |
| LOC101117954 | greenyellow  |
| TEL02        | brown        |
| ZADH2. 1     | salmon       |
| WDFY4        | red          |
| LOC101119456 | black        |
| DNAJB13      | turquoise    |
| LOC101119431 | blue         |
| AGL          | turquoise    |
| LOC101105609 | brown        |
| BLOC1S3      | brown        |
| PACRG        | turquoise    |
| GABRA3       | magenta      |
| AK5          | turquoise    |
| AK8          | cyan         |
| SHC3         | turquoise    |
| SLC9A5       | magenta      |

---

|              |              |
|--------------|--------------|
| LOC101120622 | blue         |
| SLC17A5.1    | yellow       |
| POLR3G       | magenta      |
| LAT2         | black        |
| LOC101105919 | blue         |
| LOC101113617 | green        |
| XLOC_030735  | turquoise    |
| LPAR3        | turquoise    |
| LOC101109035 | salmon       |
| LRRC10B      | turquoise    |
| NOVA2        | yellow       |
| LOC101115106 | green        |
| HOXD11       | salmon       |
| LOC101113726 | cyan         |
| TEKT3        | yellow       |
| XLOC_001539  | tan          |
| LOC101120476 | brown        |
| LOC101119585 | blue         |
| GCNT4        | lightcyan    |
| LOC101115275 | midnightblue |
| KCTD17       | blue         |
| KRIT1        | blue         |

---
